# Supplementary material for: Assessing post-abortion care in health facilities in Afghanistan: a cross-sectional study
Source: PubMed Central journal article supplement (PMC4320442; doi:10.1186/s12884-015-0439-x), 2015-02-03
Supplement: 12884_2015_439_MOESM1_ESM.pdf [file 12884_2015_439_MOESM1_ESM.pdf]

**PROVIDER INTERVIEW GUIDE\***

\* Excerpted from Afghanistan Emergency Obstetric and Newborn Care Needs Assessment Provider Interview Guide

**Interview Data**

1. Assessor ID: \_\_\_\_\_ 2. Date: \_\_\_\_\_  
 3. Start Time: \_\_\_\_\_ 4. End Time: \_\_\_\_\_

**Health Facility Data**

5. Health Facility National ID Number \_\_\_\_\_ 6. Health Facility Type: CHC, DH, PH, RH, SH  
 7. Province: \_\_\_\_\_ 8. District: \_\_\_\_\_

**Provider Data**

9. Study-Assigned Provider ID Number \_\_\_\_\_ 10. Cadre: (Circle one) Doctor, Midwife, Other  
 11. Time provider has worked at this health facility \_\_\_\_\_ years  
 \_\_\_\_\_ months 12. Number of years and months in clinical EmONC practice since qualification \_\_\_\_\_ years  
 \_\_\_\_\_ months

**INSTRUCTIONS TO THE ASSESSOR/INTERVIEWER:**

- Ask the questions. Do not read aloud the answers unless the question specifies that the answers be read aloud.
- Circle the correct number corresponding to the response given in each cell.
- If NA is circled, please explain why in the Comments section at the end of this checklist.

| No. | Question                                                                                                                                                   | Response                                                                                                                                                                                                                                                                                                                                                                                     | Mentioned                                 | Did not Mention                           |
|-----|------------------------------------------------------------------------------------------------------------------------------------------------------------|----------------------------------------------------------------------------------------------------------------------------------------------------------------------------------------------------------------------------------------------------------------------------------------------------------------------------------------------------------------------------------------------|-------------------------------------------|-------------------------------------------|
|     | What are the immediate complications of an unsafe abortion?<br>(Circle all spontaneous answers and ask: "Anything else?")                                  | a. Sepsis<br>b. Bleeding<br>c. Genital injuries<br>d. Shock                                                                                                                                                                                                                                                                                                                                  | 1<br>1<br>1<br>1                          | 0<br>0<br>0<br>0                          |
|     | When you see a woman with complications from an unsafe or incomplete abortion, what do you do?<br>(Circle all spontaneous answers and ask: Anything else?) | a. Do a vaginal exam<br>b. Assess vaginal bleeding<br>c. Assess vital signs<br>d. Begin IV fluids<br>e. Begin antibiotics<br>f. Do manual vacuum aspiration (MVA)<br>g. Do conventional evacuation with curettage<br>h. Provide counseling<br>i. Refer                                                                                                                                       | 1<br>1<br>1<br>1<br>1<br>1<br>1<br>1<br>1 | 0<br>0<br>0<br>0<br>0<br>0<br>0<br>0<br>0 |
|     | What information do you give patients who were treated for an incomplete or unsafe abortion?<br>(Circle all spontaneous answers and ask: Anything else?)   | a. Information on how to prevent RTI/HIV<br>b. Information about when a woman can conceive again<br>c. Counseling on FP and services<br>d. Refer for FP to receive contraceptive method if the woman desires this<br>e. Info. On waiting at least 6 months before becoming pregnant again<br>f. Information on social support<br>g. Information about the consequences of an unsafe abortion | 1<br>1<br>1<br>1<br>1<br>1<br>1           | 0<br>0<br>0<br>0<br>0<br>0<br>0           |
